# Supplementary material
Source: PubMed Central journal article supplement (PMC3537221)

**Supplementary Table 1. Population characteristics of patients with dialysis-requiring acute kidney injury in the U.S., 2000-2009**

| <b>Characteristic</b>      | <b>Total</b> |
|----------------------------|--------------|
| Number of hospitalizations | 1 095 000    |
| Age - years (mean)         | 63.4         |
| Male sex (%)               | 57.3         |
| Race/ethnicity (%)         |              |
| White, non-Hispanic        | 49.5         |
| Black, non-Hispanic        | 15.6         |
| Other                      | 14.0         |
| Missing                    | 20.9         |
| Geography (%)              |              |
| Northeast                  | 16.0         |
| Midwest                    | 24.4         |
| West                       | 21.7         |
| South                      | 37.9         |
| Coexisting diagnoses (%)   |              |
| Sepsis                     | 27.7         |
| Acute heart failure        | 6.2          |
| Cardiac catheterization    | 5.2          |
| Mechanical Ventilation     | 29.9         |

**Supplementary Figure 1. Incidence of dialysis-requiring acute kidney injury in the U.S., 2000-2009, by race-group.**

The left figure utilizes all available race data from all states that provided data; the right figure uses only data from the 16 states that had race data for all 10 years (CA, CO, CT, FL, HI, IA, KS, MD, MA, MO, NJ, NY, SC, TN, UT, WI).

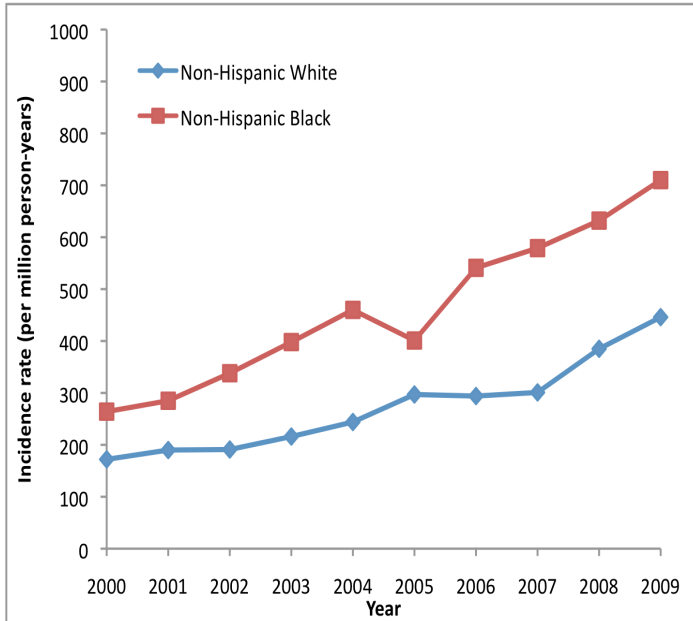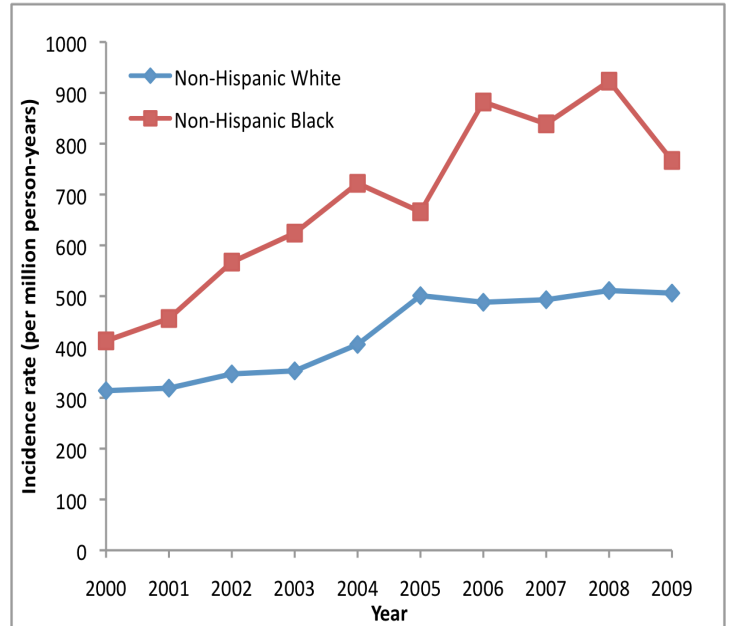

Supplement: ASN.2012080800_ASN2012080800SupplementaryData.pdf [file ASN.2012080800_ASN2012080800SupplementaryData.pdf]
